# Supplementary material for: A novel redox/pH dual-responsive and hyaluronic acid-decorated multifunctional magnetic complex micelle for targeted gambogic acid delivery for the treatment of triple negative breast cancer
Source: PubMed Central journal article supplement (PMC6225507; doi:10.1080/10717544.2018.1486472), 2018-10-18
Supplement: IDRD_A_1486472_SM6912.pdf [file IDRD_A_1486472_SM6912.pdf]

**Supporting Information for “A novel redox/pH dual-responsive and hyaluronic acid-decorated multifunctional magnetic complex micelle for targeted gambogic acid delivery for the treatment of triple negative breast cancer”**

Mangmang Sang,<sup>1,2</sup> Fulei Liu,<sup>3</sup> Yang Wang,<sup>1,2</sup> Renjie Luo,<sup>1,2</sup> Xiaoxian Huan,<sup>3</sup> Lingfei Han,<sup>1,2</sup> Zhongtao Zhang,<sup>3</sup> Feng Feng,<sup>3</sup> Wei Qu,<sup>3</sup> Wenyuan Liu,<sup>1,2</sup> & Feng Zheng<sup>1,2</sup>

<sup>1</sup> *Key Laboratory of Drug Quality Control and Pharmacovigilance, Ministry of Education, China Pharmaceutical University, Nanjing 210009, People's Republic of China*

<sup>2</sup> *Department of Pharmaceutical Analysis, China Pharmaceutical University, Nanjing 210009, People's Republic of China*

<sup>3</sup> *Department of Natural Medicinal Chemistry, China Pharmaceutical University, Nanjing 210009, People's Republic of China*

*[Corresponding author] Wenyuan Liu: Prof., Tel/Fax: +86 025 83271038; E-mail address: liuwenyuan8506@163.com. Feng Zheng: Prof., Tel: +86 13913983206; E-mail: cpu\_analyst@126.com*

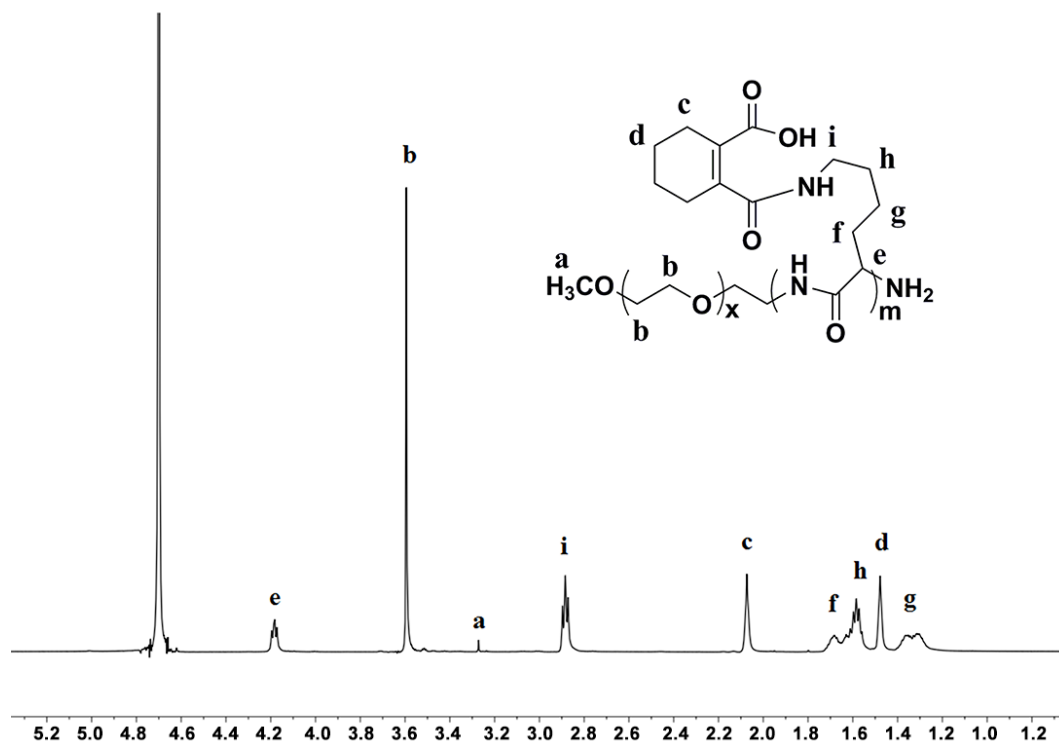

**Figure S1.** The <sup>1</sup>H NMR spectra of sPEG in D<sub>2</sub>O.

**Table S1.** Pharmacokinetic parameters of sPEG/HA/CSO-SS-Hex/Fe<sub>3</sub>O<sub>4</sub>/GA and GA (n=6).

| Parameter          | Units             | sPEG/HA/CSO-SS<br>-Hex/Fe <sub>3</sub> O <sub>4</sub> /GA |              |
|--------------------|-------------------|-----------------------------------------------------------|--------------|
|                    |                   | sPEG/HA/CSO-SS                                            | GA           |
| C <sub>max</sub>   | μg/ml             | 3.85 ± 2.34                                               | 1.61 ± 0.98  |
| t <sub>1/2</sub>   | h                 | 0.38 ± 0.20                                               | 0.09 ± 0.01  |
| CL                 | (mg/kg)/(μg/ml)/h | 4.14 ± 1.23                                               | 23.98 ± 4.56 |
| AUC <sub>0-t</sub> | μg/ml*h           | 1.44 ± 1.08                                               | 0.25 ± 0.11  |
| AUC <sub>0-∞</sub> | μg/ml*h           | 1.45 ± 0.78                                               | 0.25 ± 0.14  |
| MRT                | h                 | 0.49 ± 0.22                                               | 0.14 ± 0.23  |
